# Supplementary material for: Lanthanide cationextraction by malonamideligands: from liquid–liquid interfaces to microemulsions. A molecular dynamics study
Source: Royal Society of Chemistry journal article supplement (doi:10.1039/b410137e), 2004-10-26
Supplement: b410137e-esi.pdf [file b410137e-esi.pdf]

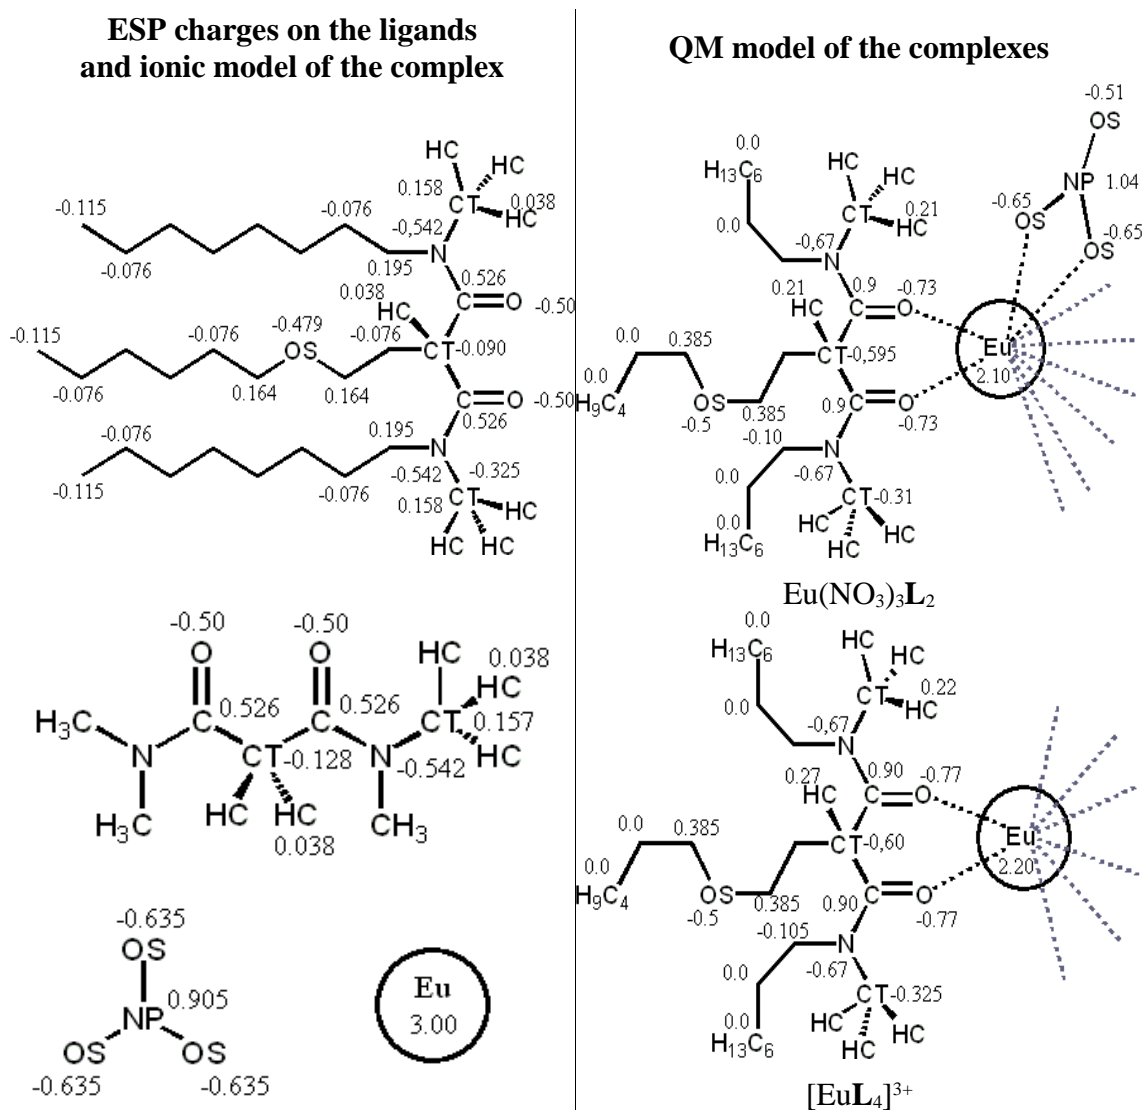

Figure S1. AMBER atom types and atomic charges used to simulate the malonamides and their complexes.

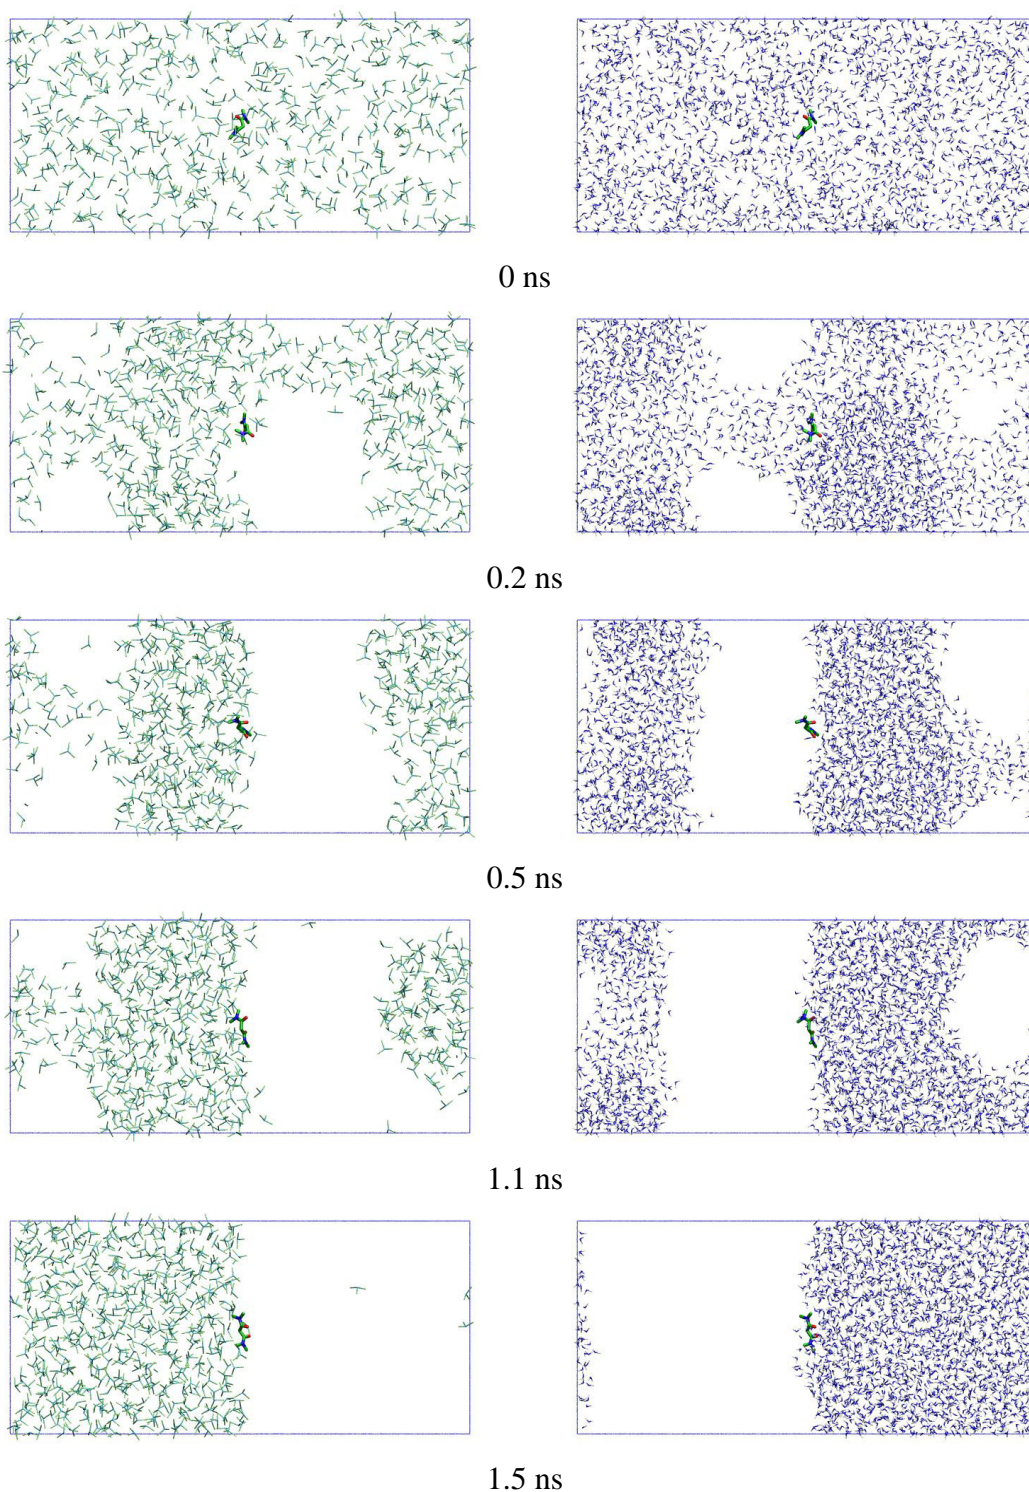

**Figure S2.** Demixing simulation of a water / chloroform solution with one  $L_0$  malonamide (initially in its *trans* form). Snapshots at different times, showing the chloroform (left) and water (right) solvents separately instead of superimposed, for clarity.



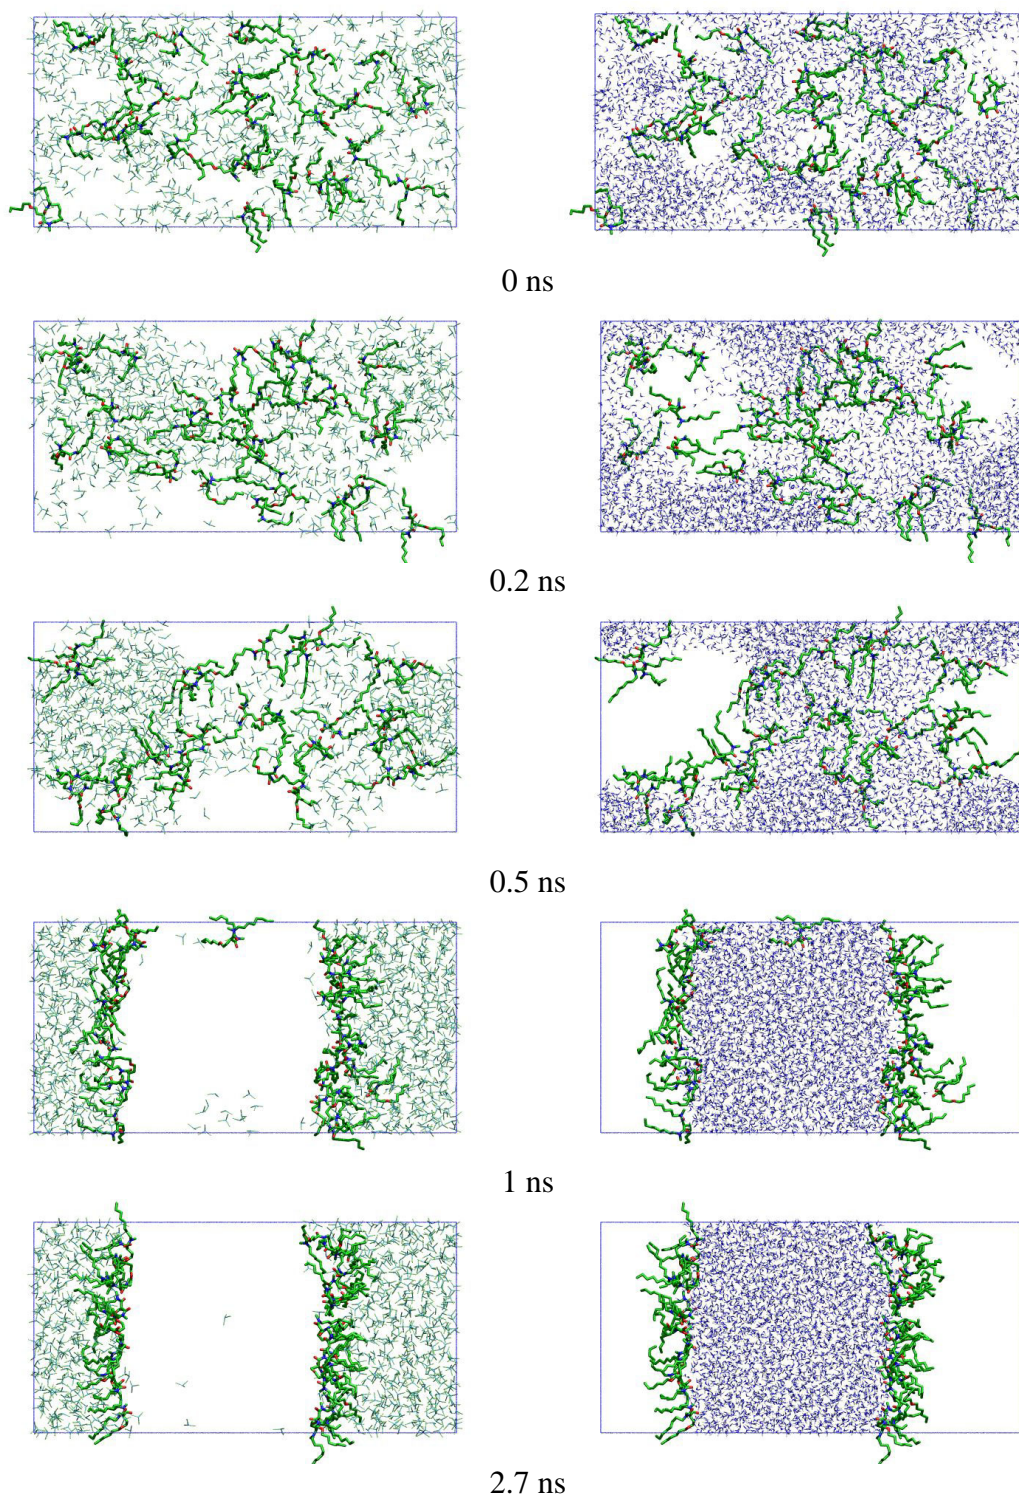

**Figure S3.** Demixing simulation of a water / chloroform solution with 27 L malonamides (initially *EE-gauche*). The amide (O)C-N  $V_2$  torsion parameter was set to 2.5 kcal/mol (from 0 to 2 ns) and to 10.5 kcal/mol after 2 ns. Snapshots at different times, showing the chloroform (left) and water (right) solvents separately instead of superimposed, for clarity.

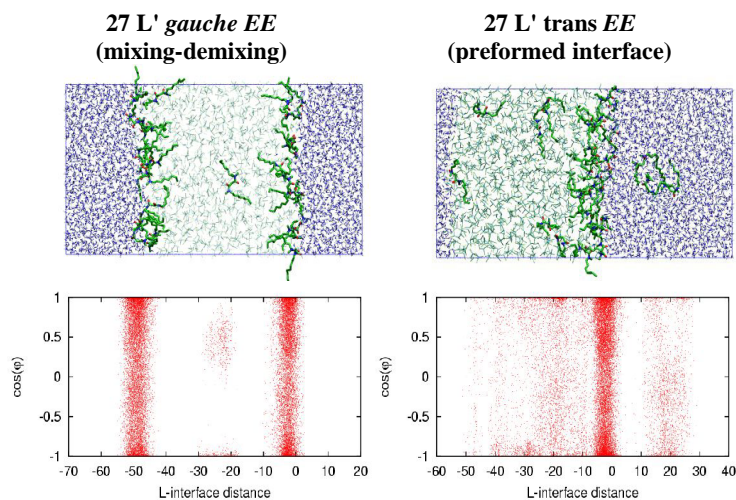

**Figure S4:** Solutions of 27  $L'$  (analogue of  $L$  with central chain replaced by H) at the interface. Sampling simulations with biased torsional C(O)-N potentials starting with *EE gauche* and *EE trans* forms of  $L'$ , respectively, in a mixing-demixing simulation and at the preformed interface. *Top:* snapshots after 2 ns; *bottom:* statistical distribution of the O=C--C=O angles ( $\cos(\varphi)$ ) as a function of  $z$  (Å)

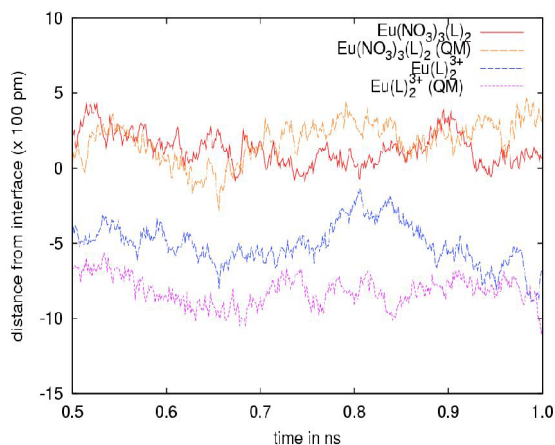

Figure S5. Mixtures of 26 L ligands (*EE gauche*) and  $\text{Eu}(\text{NO}_3)_3\text{L}_2$  or  $\text{EuL}_4^{3+}$  complexes at the oil / water interface. Distances between  $\text{Eu}^{3+}$  and the interface as a function of time (ns).



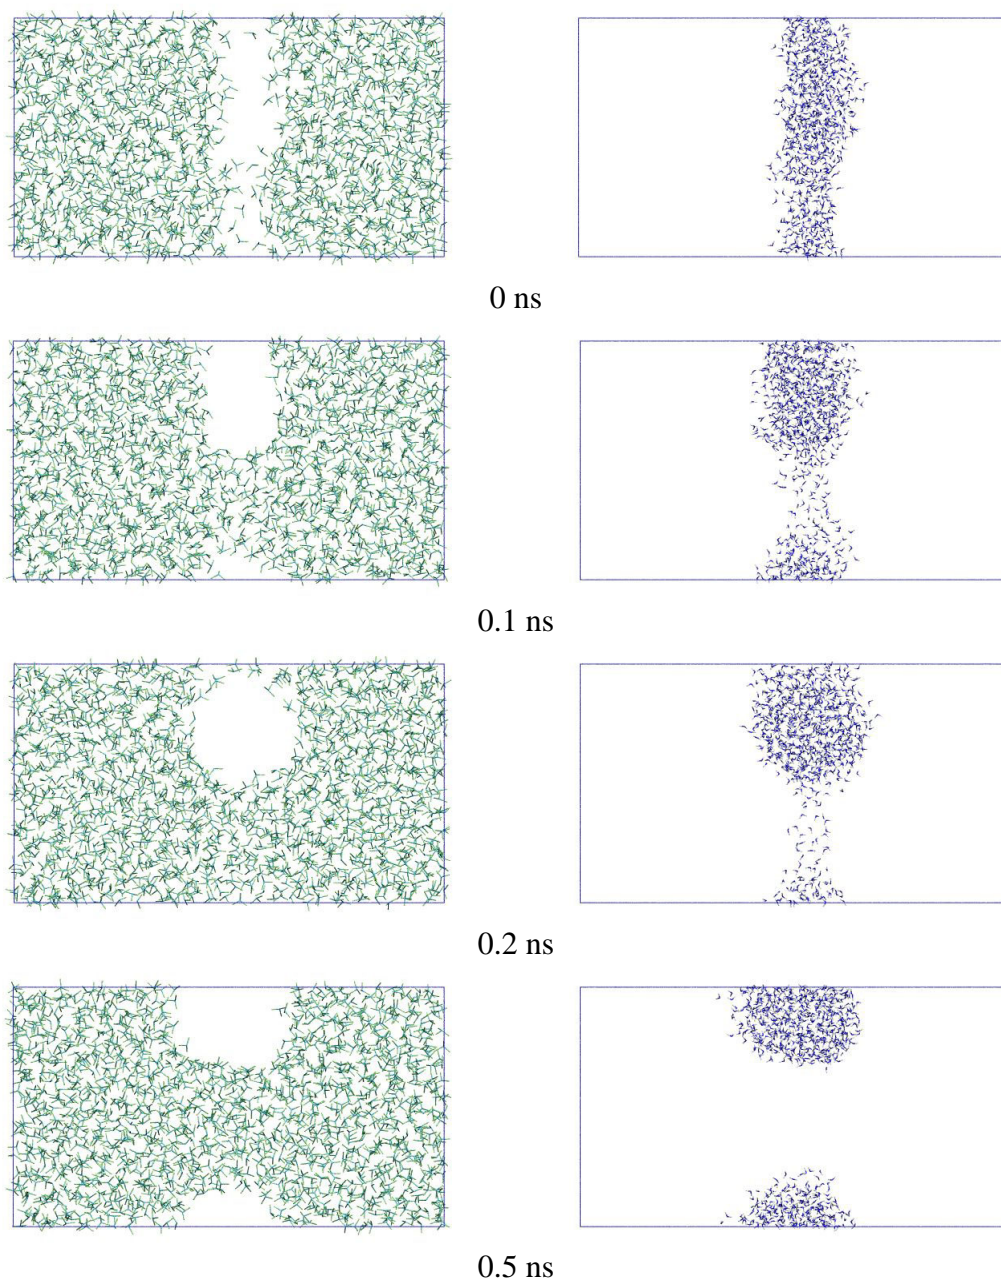

**Figure S6.** Simulation of a 90:10 chloroform:water "interface" (rectangular box). Snapshots at different times, showing the chloroform (*left*) and water (*right*) solvents separately, instead of superimposed, for clarity.

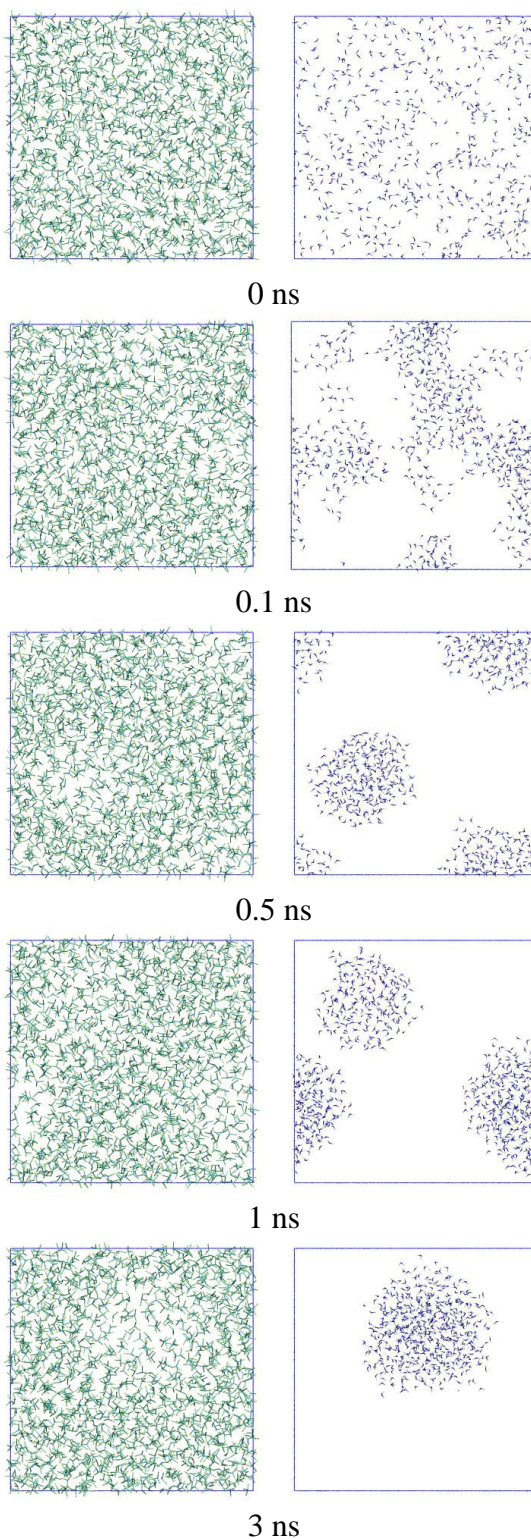

**Figure S7.** Demixing simulation of a 90:10 chloroform:water mixture ("cubic box"). Snapshots at different times, showing the chloroform (*left*) and water (*right*) solvents separately instead of superimposed, for clarity.

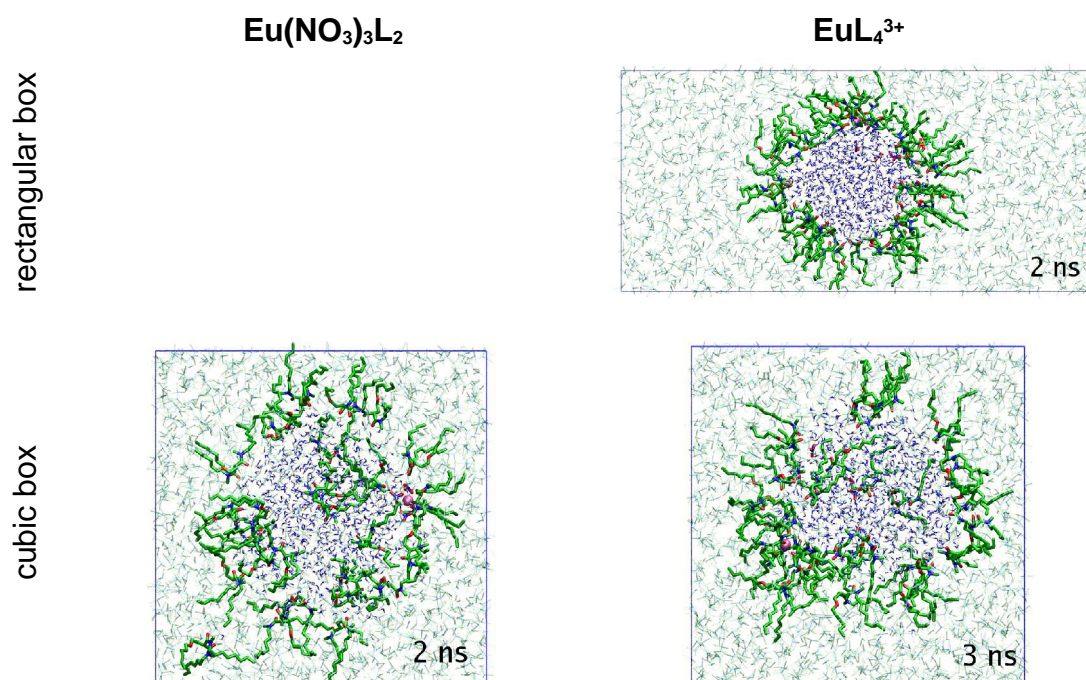

**Figure S8.** Final snapshots (after 2 ns) of 26 L ligands + 1 Eu(NO<sub>3</sub>)<sub>3</sub>L<sub>2</sub> (*left*) or 1 EuL<sub>4</sub><sup>3+</sup> (*right*) complex (ionic model) in a 95:5 oil:water mixture. *Top*: simulation in a rectangular box starting at a preformed interface. *Bottom*: demixing simulation in a cubic box.



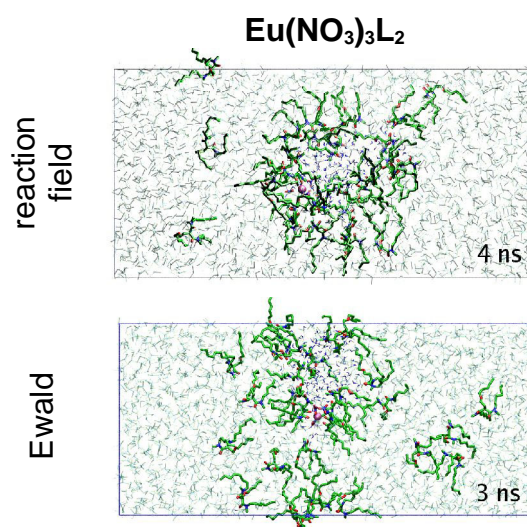

**Figure S9.26** L ligands + 1 Eu(NO<sub>3</sub>)<sub>3</sub>L<sub>2</sub> complex (ionic model) in a 95:5 oil:water mixture. Final snapshots after 1.5 ns of simulations performed with the reaction field (*top*) versus Ewald (*bottom*) treatments of electrostatics.

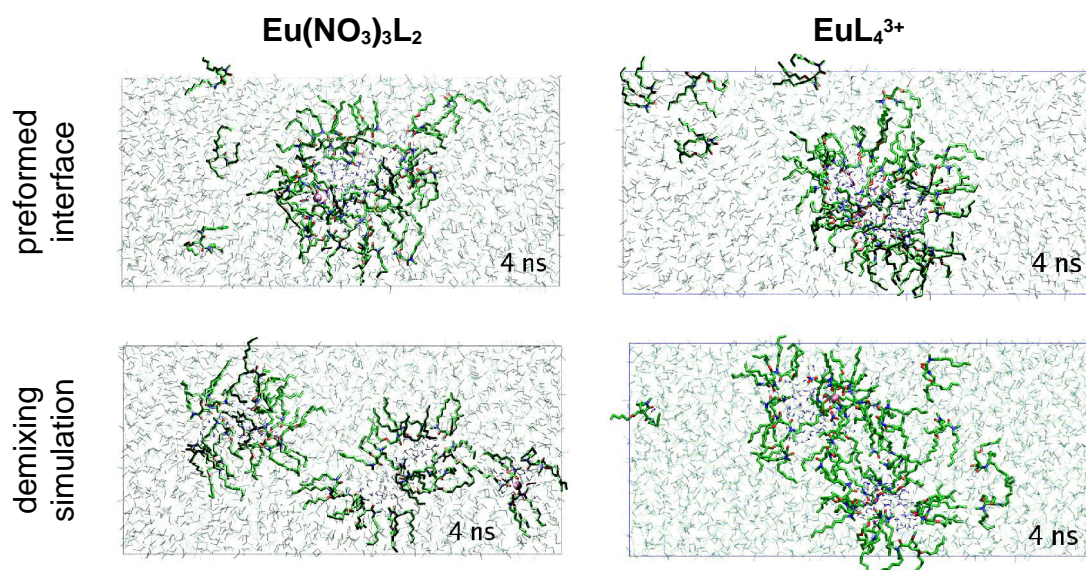

**Figure S10.** 26 L ligands + 1  $\text{Eu}(\text{NO}_3)_3\text{L}_2$  (left) or 1  $\text{EuL}_4^{3+}$  (right) complex (ionic model) in a 95:5 oil:water mixture. Final snapshots from simulations which started at a preformed interface (top), and obtained from a mixing-demixing simulation (bottom). See also Figure S12 for the demixing results.

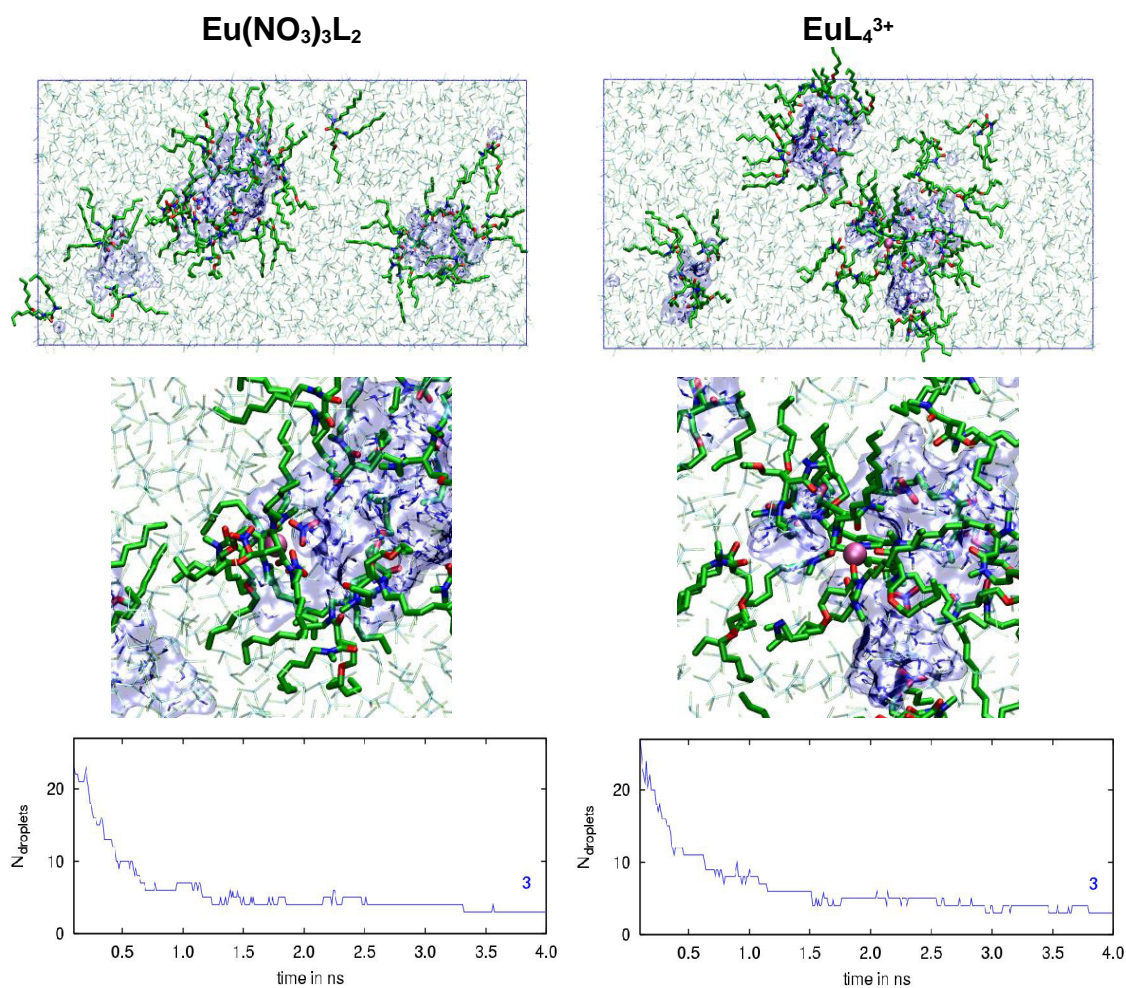

**Figure S11.** 26 L ligands + 1  $\text{Eu}(\text{NO}_3)_3\text{L}_2$  (left) or 1  $\text{EuL}_4^{3+}$  (right) complex (QM model) in a 95:5 oil:water mixture. Final snapshots and zooms after 4 ns of mixing-demixing simulations. *Bottom:* time evolution of the number of water aggregates during the demixing simulation.



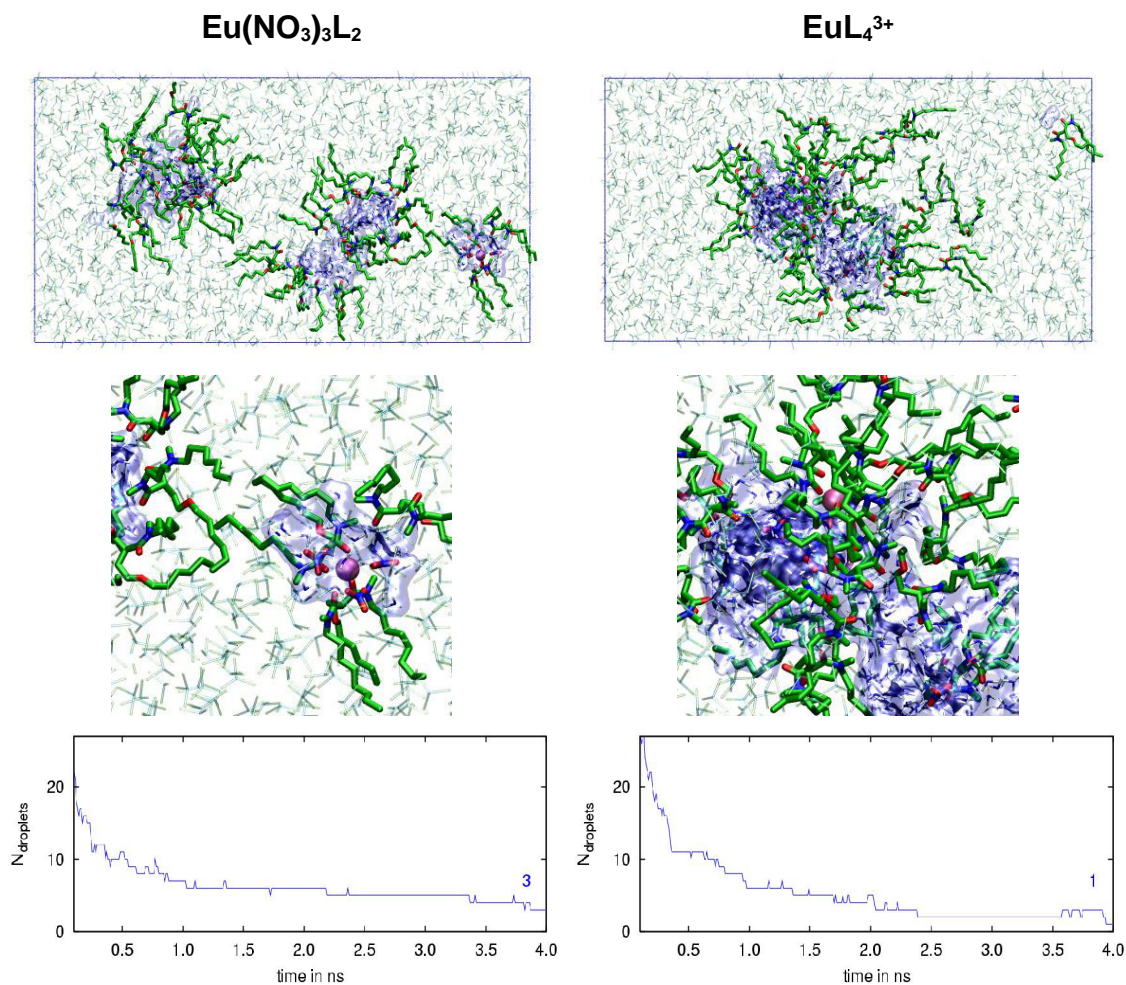

**Figure S12.** 26 L ligands + 1  $\text{Eu}(\text{NO}_3)_3\text{L}_2$  (left) or 1  $\text{EuL}_4^{3+}$  (right) complex (ionic model) in a 95:5 oil:water mixture. Final snapshots and zooms after 4 ns of mixing-demixing simulations. *Bottom:* time evolution of the number of water aggregates during the demixing simulation.
